# Supplementary material for: Direct Tests of Enzymatic Heme Degradation by the Malaria Parasite Plasmodium falciparum
Source: PubMed Central journal article supplement — J Biol Chem. 2012 Sep 19;287(45):37793–807. doi: 10.1074/jbc.M112.414078 (PMC3488054; doi:10.1074/jbc.m112.414078), 2012-09-19
Supplement: supp_M112.414078_jbc.M112.414078-1.pdf [file supp_M112.414078_jbc.M112.414078-1.pdf]

## Direct Tests of Enzymatic Heme Degradation by the Malaria Parasite *Plasmodium falciparum*

**A**

**PFC0785c** MNLEEFNELVKKREDIENELKEHMDFLERPENKNVG--MKGNLIDSEGFPRNDIDIYSIR 58  
**AtHO4** MATSRLNASCRFPASRRLDCEYSVSLRAKTVTIRYVRTIAAPRRHLVRRANEDQTLVVNV 60  
 \* \* \* \* \* \*

**PFC0785c** VARNKIICLNKYIDINKKLEEYIHKVHSTHPVIRVERKKNINNDLLNTP-QQITKEEDI 117  
**AtHO4** VAAAGEKPERRYPREPNGFVEEMRFVVMKIHQEIQVKEGKSVSNDLVSTWNFTIEGYLKF 120  
 \*\* \* \* \* \* \* \* \* \* \* \* \*

**PFC0785c** KNAKKNVFAIIDEVIENSPSHKSGLKINDQIFQFGNIKTNENKKEHEHHPNLNVELIKD 177  
**AtHO4** LVDSKLVFETLERIINESAIQAYAGLKNTGLERAENLSRDLEWFKEQGYEIPESMVPKA 180  
 \* \* \* \* \* \* \* \* \* \* \*

**PFC0785c** IAKYMKTQPKQ-----IVVKILREENIFFPHIPEQTHN 211  
**AtHO4** YSQYLKNIAEKDPAPFICHFYININFAHSAGGRMIGTKVAEKILDNKELEFYKWDGQLSL 240  
 \* \* \* \* \* \* \* \* \* \*

**PFC0785c** GLYLGCHLSPFDSS----- 225  
**AtHO4** LQNVSEELNKVAELWTREKKNHCLTEETKSFKIFYWEIFRYLLS 283  
 \*

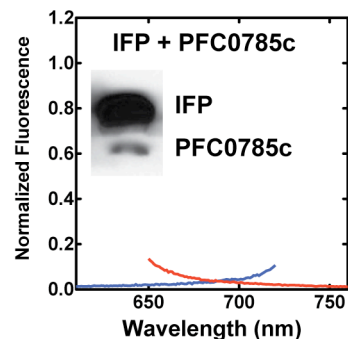

**B**

**PF10\_0029** -MGNIIPFKTFEEKDTKTKDLINDEKYLINIDNPKDVVS--TMQHNSIKNNSSMEQEN- 56  
**HuHO2** MSAEVTSEGVDESEKKNNGALEKENQMRMADLSELLKEGTKEAHDRAENTQFVKDFLKG 60  
 \* \* \* \* \* \* \* \* \* \* \*

**PF10\_0029** NIKHELEKIKENFYLFDDSLDSN---NMKHPCHAQWFLVWFVFA-----YLNEK 103  
**HuHO2** NIKKELFKLATATLYFTYSALEEEMERNKDHAFAPLYFPMELHRKALTKDMEYFFGEN 120  
 \* \* \* \* \* \* \* \* \* \* \*

**PF10\_0029** FSDTEK-----ENVHAFYSNPFPEQCIR----- 125  
**HuHO2** WEEQVQCPKAAQKVVERIHVIGQNEPELLVAHAYTRYMGDLGGQVLKVAQRALKLPST 180  
 \* \* \* \* \* \* \* \* \* \*

**PF10\_0029** GKGKNCFS-----DFLKIYPIRAGTREELMMWLQMCENYCRKKADLPVKVFN---Y 173  
**HuHO2** GEGTQFYLFENVDNAQQFKQLYRARNALDLNMKTKERIVEEANKAFEYNNMQIFNELDQA 240  
 \* \* \* \* \* \* \* \* \* \* \*

**PF10\_0029** GKLLKRWRYYDDDI----- 187  
**HuHO2** GSTLARETLEDGFPVHDGKGMKCPFYAAEQDKGALEGGSCFPRTAMAVLRKPSLQFIL 300  
 \* \* \* \* \* \* \* \* \* \*

**PF10\_0029** ----- 316  
**HuHO2** AAGVALAAGLLAWYIM 316

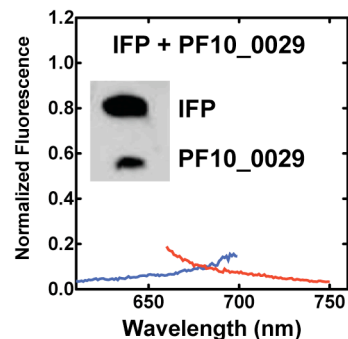

**C**

**PFE0565w** MNMINIGYLLVLSFLLEKTFYGSDFRVFEDFVRRKNIWCCNLNHEKSYFHNKTIN 60  
**AtHO4** -----MATSRLNASCRFPASRRLDCE-----YVSLRAKTVTIRYVRTIA 40  
 \* \* \* \* \* \* \* \* \* \*

**PFE0565w** TSYKNRVLKESILLNLDLDMKKYKDNIIIRKKTPENIYKEIYENNYEMKYDEDIPNMSE 120  
**AtHO4** APRRHVRRANEDQTLVVNVVAAAGEKPERRYPRE-----PNGFVE 81  
 \* \* \* \* \* \* \* \* \* \*

**PFE0565w** EKRDEKEVIEHLEIDEKNGKQYKSDINKPVLSHLKQYKNIYVNNNNKINKKSIDKHL 180  
**AtHO4** EMR-FVVMKIHQEIQVKEGKSVSNDLVSTWNFT-IEGYLKFVDSKLVFETLERIINESA 139  
 \* \* \* \* \* \* \* \* \* \* \*

**PFE0565w** SYNLERKNNKYNLFLVDNRNESYTFMVPKIFYINHEMYNISDEEYKLMEDNSVDVYLN 240  
**AtHO4** IQAYAGLKN--TGLERAENLSRDLEWFKEQGYEIPESMVP--KAYSQYLKN-IAEKDPP 194  
 \* \* \* \* \* \* \* \* \* \* \*

**PFE0565w** NILVEYKYENFEIKEGEVDGEVEGEVEGEVEGEVKGKRVVEGIENNMEEEKYNKDNKD 300  
**AtHO4** AFICHFYININFAHSAG---GRMIGTKVAEKILD--NKELEFYKWDGQLSLQNVSEELN 249  
 \* \* \* \* \* \* \* \* \* \* \*

**PFE0565w** KENQINSNGQDENTEPQENDNNDVIMKYTIIISGLVLLFCISFIIYYFDIIQVKMKLN 360  
**AtHO4** KVAELWTR-EKKNHCLTEETKS-----FKFYWEIFRYLLS--- 283  
 \* \* \* \* \* \* \* \* \* \*

**PFE0565w** KKRKSATMAINRDKIQEEFM 381  
**AtHO4** -----

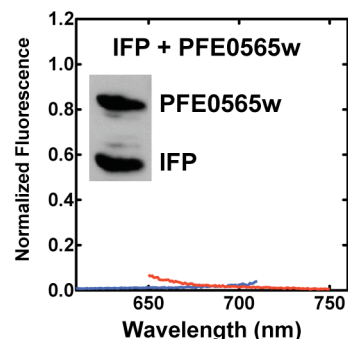

**Supplemental Figure S1. Sequence alignment and HO activity tests of additional HO-like proteins from *P. falciparum*.** Parasite HO-like proteins PFC0785c (now PF3D7\_0317800) (A), PF10\_0029 (now PF3D7\_1002500) (B), and PFE0565w (now PF3D7\_0511400) (C) were identified by BLAST search and aligned by ClustalW to the indicated query HO sequence. The conserved heme-coordinating His residue in each known HO and the aligned His residue in the parasite proteins are shown in red. Each parasite protein was co-expressed in *E. coli* with IFP, and fluorescence excitation/emission spectra were acquired for each clarified bacterial lysate. Soluble protein expression was confirmed by anti-His<sub>6</sub> western blot of the clarified lysate.
